# 1 Codesign of digital health tools for suicide prevention: A scoping 2 review

## 3 Codesign, digital tools and suicide prevention

4  
5 Dianne Wepa 1 2 3 ¶ #a, Martin Neale 1 ¶, Waseem Abo-Gazala 1 ¶, Sally Cusworth 1  
6 &, Jae Hargan 4 &, Manoj Mistry 1 &, Jimmy Vaughan 1 &, Stephen Giles 1 &, Mehnaz  
7 Khan 1 &

- 8  
9 1. School of Nursing & Healthcare Leadership, Faculty of Health Studies,  
10 University of Bradford, West Yorkshire, United Kingdom  
11 2. School of Public Health, Faculty of Health & Environmental Sciences, Auckland  
12 University of Technology, New Zealand  
13 3. Mental Health and Suicide Prevention Research and Education Group, Clinical  
14 and Health Sciences, University of South Australia, Australia  
15 4. School of Allied Health & Midwifery, Faculty of Health Studies, University of  
16 Bradford, West Yorkshire, United Kingdom  
17

18  
19  
20 \* Corresponding author

21 Email: [d.wepa@bradford.ac.uk](mailto:d.wepa@bradford.ac.uk)

22  
23 #a Current address

24 University of Bradford, Richmond Road, Bradford, West Yorkshire, BD7 1DP, United  
25 Kingdom

26  
27 ¶ These authors contributed equally to this work

28 & These authors also contributed equally to this work  
29

30

## 31 Abstract

32 The importance of codesigning digital health tools for suicide prevention has gained popularity since  
33 2012. Promoted as cost-effective and innovative, digital health tools are widely used but seldom  
34 described or evaluated from a codesign lens. This scoping review provides an overview of the research  
35 and gaps in the delivery of codesigned digital health tools for suicide prevention. This review is phase  
36 two within a three-phase study. Phase one involved a scoping review protocol which informed this  
37 scoping review and the results will contribute to a proof-of-concept project to develop a digital tool  
38 for suicide prevention (phase three).

39 The search strategy followed the Preferred Reporting Items for Systematic Reviews and Meta-  
40 Analyses Extension for Scoping Reviews (PRISMA-SCR) and Population, Concept, Context (PCC)  
41 framework to ensure reporting standards were maintained and supplemented by Arksey and O'Malley  
42 and Levac et al. The search dates occurred from November 2022 to March 2023. Five data bases were  
43 searched: Medline, Scopus, CINAHL, PsycInfo and Cochrane Database of Systematic Reviews. Grey  
44 literature searches included government, non-government health websites, Google and Google  
45 Scholar.

46 3260 records were identified from the initial search and 61 were included in the final review. All  
47 members of the research team screened the included records. Data from published and grey literature  
48 were extracted and a narrative approach identified the results and five themes (acceptability by users,  
49 future inclusion of experts-by-experience, inconsistent use of Patient and Public Involvement (PPI),  
50 digital tools to supplement face-to-face therapy and digital divide).

51 We found that none of the data from the included studies used codesign methodology and experts-  
52 by-experience roles were minimised as members of focus groups, advisory groups, pilot studies or at  
53 the final stage of usability testing. Future research is required where codesign involves co-authorship

54 with experts-by experience, end-to-end partnership from design, implementation and evaluation of  
55 digital health tools for suicide prevention.

## 56 Author summary

57 As more people turn to digital technology (such as mobile apps and websites) to help with their mental  
58 health, they enjoy many of the benefits such as feeling less judged and being more affordable than  
59 face-to-face therapy. There are also risks involved such as how privacy is managed and reliance on the  
60 distressed person to self-manage their signs and symptoms. We found that people who have  
61 experienced suicidal thoughts and carers did not have an equal voice with those that developed the  
62 digital tools for suicide prevention. Our group comprising of experts-by-experience, health  
63 professionals, a mental health nursing student, technology expert and researchers felt that there was  
64 a gap in this area and met on a monthly basis for one year to see what the literature was saying. We  
65 found that the term codesign was used a lot but when we looked deeper into the articles and websites,  
66 we noted that experts-by-experience were only included to test apps or were involved in focus or  
67 advisory groups. We will be using the information from this scoping review to apply for funding to  
68 develop a digital solution that is truly designed with and by the people that need it the most.

69

## 70 Introduction

71 Suicide affects more than 700,000 globally each year [1] and the ripple effect extends to the person's  
72 family, friends and community [2]. As a response to prevent suicide, over 10,000 digital health  
73 technologies (video conferencing, smartphone apps, texting and social media) emerged as the first  
74 port-of-call for people experiencing mental health distress especially during and immediately after the  
75 COVID-19 pandemic [3-7]. Given the exponential rise of digital solutions for suicide prevention, there  
76 appears however, to be a disconnect between bringing the technology to market and involving  
77 experts-by-experience or service users as codesigners [8]. With a rapidly evolving technological

78 environment, understanding the place and space of experts-by-experience in suicide prevention  
79 requires urgent attention.

80 For this scoping review the following definitions of codesign and experts-by-experience are provided.

81 Codesign is defined as ‘a co-creation approach involving collaboration between researchers and end  
82 users from the onset’ [9] (p. 1). Experts-by-experience is a term that was selected by our research  
83 Patient and Public Involvement (PPI) group members, as it reflected the range of experiences as carers  
84 and mental health services users. Experts-by-experience is therefore defined as ‘people who have  
85 recent personal experience of using and caring for someone who uses health, mental health and/or  
86 social care services’ [10].

87 This scoping review is phase two within a three-phase study. During phase one, our scoping review  
88 protocol outlined the process for the study which informed this review [11]. Results from this scoping  
89 review will inform a funding application to codesign a proof-of-concept digital health tool for suicide  
90 prevention (phase three).

## 91 **Materials and methods**

92 We used the recommended six stages of scoping reviews [12,13] and the Preferred Reporting Items  
93 for Systemic Reviews and Meta-Analyses Extension for Scoping Reviews checklist (PRISMA-ScR)  
94 guidelines [14]. This review did not appraise the quality of evidence found as it sought to examine a  
95 topic which has not been systematically reviewed before. We used the Population-Concept-Context  
96 (PCC) framework to strengthen the importance of this methodology [15].

97

### 98 **Stage One: Identifying the research question**

99 Our research question was: *What is known from the existing literature about codesign of digital health*  
100 *tools for suicide prevention*. The PPC framework assisted with guiding us to identify the important

101 aspects of the research question and determining the inclusion and exclusion criteria. We conducted  
 102 our search from November 2022 to March 2023. The population of interest included patients,  
 103 students, adults, internet users, experts by experience, service users and soldiers. Concept included  
 104 suicide intervention, reduction and prevention. Context were countries such as New Zealand, UK, USA,  
 105 Australia and countries that produced English language as primary and secondary literature within the  
 106 European Union. The search timeframe was from 2012-2023 to ensure recency of the evolving nature  
 107 of digital technology. The exclusion criteria were study protocols and opinion/editorial data. The  
 108 search strings for published and grey literature are provided in Table 1.

109 **Table 1. Population, Concept, Context & Search String.**  
 110

| Population                                                                                                       | Search String                                                                                                                                                                                        |
|------------------------------------------------------------------------------------------------------------------|------------------------------------------------------------------------------------------------------------------------------------------------------------------------------------------------------|
| Patients<br>Adults<br>Internet users<br>Experts by experience<br>Students<br>Pupils<br>Soldiers<br>Service users | Patient* OR student* OR "internet user*" OR<br>Adult* OR pupil* OR soldier* OR "experts by experience" OR "service<br>user*"                                                                         |
| Concept                                                                                                          | Softwar* OR app* OR tool* OR technolog* OR digital* AND suicide*<br>OR "suicide prevent*" OR "suicide reduc*" OR "suicide intervent*" OR<br>MH* OR "internet based" OR "web based" OR "mobile based" |
| Context                                                                                                          | >2012 AND PUBYEAR >2023<br>AND English lang*<br>UK* AND United King* OR US*<br>United State* AND Canad*<br>AND NZ* OR New Zeal*<br>AND European Un* OR EU*                                           |

111

112

## 113 **Stage Two: Identifying relevant sources**

### 114 **Published literature: Search strategy**

115 The following licensed electronic databases (from 2012 to 2023) were systematically searched:  
116 Medline, Scopus, CINAHL, PsycInfo and Cochrane Database of Systematic Reviews. The initial sources  
117 were limited to English in the UK, Canada, USA, Australia and New Zealand. After receiving feedback  
118 during the review stage of our protocol, we extended the context to include European Union countries  
119 with publications in English. Furthermore, we identified articles such as systematic reviews where the  
120 researchers were located in these respective countries, however the data they sourced were from  
121 countries such as China, Japan and Sri Lanka.

122 The initial published data of 3210 records were identified and uploaded into EndNote X9.0, a citation  
123 and management software. Almost half were duplicates and removed (n=1570) and the remaining  
124 1640 articles were exported into the reviewing software, Covidence, for title and abstract screening  
125 before full-text screening (Fig 1) [16].

126

### 127 **Grey literature: Search strategy**

128 A grey literature search (from 2012 to 2023) was conducted using institutional and government  
129 electronic databases and websites. Google and Google Scholar were searched with relevant results  
130 reviewed which included non-government organisations and social media. The sources selected were  
131 limited to English. 50 records were identified with 42 excluded once the inclusion/exclusion criteria  
132 were applied and 9 records were assessed for eligibility. The included data were Samaritans,  
133 Facebook, Save.org, Lifeline, National Suicide Prevention, Forefront, Papyrus, Mental Health  
134 Commission and Beyond Blue (Fig 1).



136 **Figure 1: PRISMA flow diagram for included searches of databases and grey literature.**  
137  
138

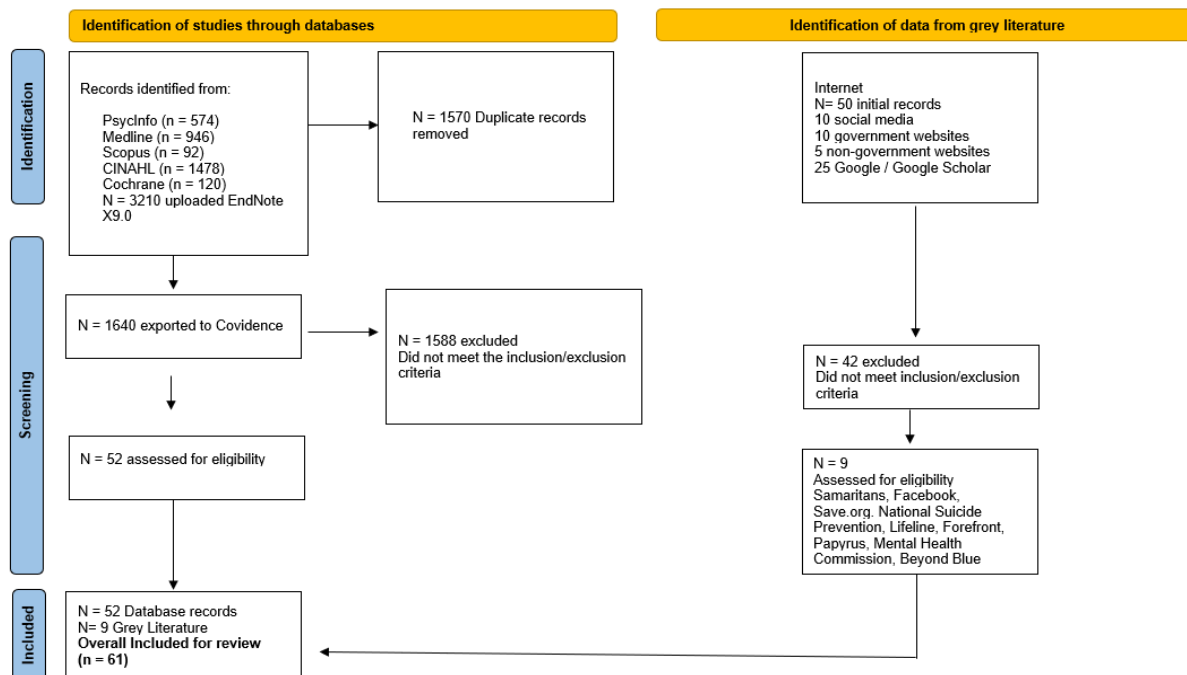

139  
140

### 141 Stage Three: Source selection

142 From the- 1640 articles uploaded into Covidence, the title and abstracts were screened by DW and  
143 WAB and MN resolved any conflicts. Full-text articles were discussed among the research team to  
144 ensure moderation of the process particularly with experts-by-experience. Once the inclusion and  
145 exclusion criteria were applied, we removed 1588 studies, leaving at total of 61 records (n=52  
146 published articles, n=9 records from grey literature).

### 147 Stage Four: Charting the data

148 All included data were first extracted from full-text articles and read and excerpts that were relevant  
149 to the research question were highlighted. Data from grey literature sources were also included in the  
150 data extraction table and included digital interventions predominantly from non-government



151 websites. The data was charted according to the following categories: Author/Year, Aim/Objectives,  
152 Methods/Analysis, Population/Sample Size, Countries, Outcome/Limitations (Table 2).

Table 2. Data extraction table.

| Published Literature             |                                                                                                                                           |                                                                                                                                               |                                    |                                                                                           |                                                                                                                                                                                                                                                                                                                                                                                                                                                                                                                                                                                                                                                                                |
|----------------------------------|-------------------------------------------------------------------------------------------------------------------------------------------|-----------------------------------------------------------------------------------------------------------------------------------------------|------------------------------------|-------------------------------------------------------------------------------------------|--------------------------------------------------------------------------------------------------------------------------------------------------------------------------------------------------------------------------------------------------------------------------------------------------------------------------------------------------------------------------------------------------------------------------------------------------------------------------------------------------------------------------------------------------------------------------------------------------------------------------------------------------------------------------------|
| Author/Year                      | Aim/objectives                                                                                                                            | Methods/Analysis                                                                                                                              | Population/sample size             | Countries                                                                                 | Outcome/Limitations                                                                                                                                                                                                                                                                                                                                                                                                                                                                                                                                                                                                                                                            |
| Arshad et al.<br>2020<br><br>5   | Reviewed the acceptability feasibility and efficacy of mobile and web-based intervention for self-injurious thoughts and behaviours (STB) | Systematic Review of 22 trials<br>12 = Randomised Control Trials<br>9 = Single-arm studies<br>1 = crossover counterbalanced controlled design | Adults                             | USA, UK, China, Denmark, Australia, Sweden, Netherland, Japan, Belgium, France, Sri Lanka | Interventions limited within the literature, qualitative data excluded. Acceptability based upon participant reported experiences of using the intervention, specifically how helpful or useful the intervention was, or the perceived likelihood of using it again in the future. Feasibility based upon intervention engagement or usage rates (e.g., number of times accessing a mobile phone app during the study period). Suicidal ideation was also included as a secondary outcome.<br>Recommend involving those with lived experience of STB in the development to ensure interventions feel acceptable and useful to the individuals they have been designed to help. |
| Bailey et al<br>2020<br><br>30   | Ethical issues and practical barriers to internet-based suicide prevention research                                                       | Mixed methods, 2 phases. Systematic search and online survey of researchers from phase one                                                    | 15 x studies<br>15 x researchers   | Australia, USA, Europe                                                                    | Difficulties in managing risk in online environments. Half of respondents reported problems with obtaining ethics approval. Assessment and management of risk is more complex with internet-based intervention studies compared to face-to-face studies. Different countries had different ethics jurisdictions. Recommend inclusion of people with lived experience in the design of interventions and trials.                                                                                                                                                                                                                                                                |
| Baines et al<br>2022<br><br>25   | Patient, public involvement in digital health innovation                                                                                  | Systematic review                                                                                                                             | 433 x articles and grey literature | UK<br>USA<br>Canada<br>Australia                                                          | Areas described: cancer n=50, mental health n=43, diabetes n=26, long-term conditions n=19. PPI most involved in the final passive stages e.g., usability testing. Ability to influence change was severely limited. Common barriers data privacy, security concerns, not involved early enough, lack of trust.                                                                                                                                                                                                                                                                                                                                                                |
| alcombe & De Leo 2022a<br><br>36 | Review of human-computer interaction in digital mental health                                                                             | Modified integrative review                                                                                                                   | Population not specified           | Australia                                                                                 | Focused on effectiveness, feasibility, accessibility, sociocultural inclusion, rigor and readiness for adoption and upkeep. Difficulty translating findings in clinical practice because of low engagement. Stepped model of care recommended with self-help or chatbots followed by therapist-guided digital therapy.                                                                                                                                                                                                                                                                                                                                                         |
| Balcombe & De Leo 2022b          | Review of digital tools for suicidal men                                                                                                  | Integrative review                                                                                                                            | Adult men                          | Australia                                                                                 | Man Up programme found active and empowering language useful. Digital phenotyping via tracking on a smartphone app can monitor patient status but not provide an intervention.                                                                                                                                                                                                                                                                                                                                                                                                                                                                                                 |

|                             |                                                                                     |                                                                 |                                                                                                |                |                                                                                                                                                                                                                                                                                                                                                                                                                                                                                                                                                                                                                                                                                                                                                                                                                                                                                                                                                                                                                                                                |
|-----------------------------|-------------------------------------------------------------------------------------|-----------------------------------------------------------------|------------------------------------------------------------------------------------------------|----------------|----------------------------------------------------------------------------------------------------------------------------------------------------------------------------------------------------------------------------------------------------------------------------------------------------------------------------------------------------------------------------------------------------------------------------------------------------------------------------------------------------------------------------------------------------------------------------------------------------------------------------------------------------------------------------------------------------------------------------------------------------------------------------------------------------------------------------------------------------------------------------------------------------------------------------------------------------------------------------------------------------------------------------------------------------------------|
| 37                          |                                                                                     |                                                                 |                                                                                                |                | Unclear what to prescribe for digital suicide prevention because of a lack of strategy integration. Need for co-design, development and evaluation when providing Virtual reality and video games.                                                                                                                                                                                                                                                                                                                                                                                                                                                                                                                                                                                                                                                                                                                                                                                                                                                             |
| Berrouiget et al 2014<br>38 | Post-acute crisis text messaging for suicide prevention                             | Evaluate acceptability of text messaging 2 months after crisis  | 4 x men<br>14 x women<br>Aged 24-61 years                                                      | France         | First message sent within 48 hours which patients were satisfied. Service did not allow patients to reply but were prompted to keep follow up appointments and to ring health provider if required. Small study sample.                                                                                                                                                                                                                                                                                                                                                                                                                                                                                                                                                                                                                                                                                                                                                                                                                                        |
| Biddle et al 2020<br>51     | Explored distressed users' perceptions of formal online help during times of crisis | Grounded theory Reporting suicide-related internet use          | 53 x Adults                                                                                    | United Kingdom | Critical of websites that only offer signposting to offline services as their primary response. Many participants regularly used formal online help for ongoing mental health difficulties. Sites lacked a sense of community or opportunity for emotional connection. Want instant chat, if going online, want to stay online. Efforts have been made by Internet Service Providers to adjust search algorithms to prioritise help sites in suicide related search output. However, research has focused on quantifying characteristics of help-seekers, trialling specific online interventions (e.g., apps), or examining online support groups, rather than seeking user evaluations of everyday online help pages.<br>Recommend formal online help services be reappraised to meet users' needs for immediacy and responsive help. Users should be co-producing new online materials and approaches. Incorporate interactive elements e.g., live chat, links to forums (moderated by health professionals), self-help tools and lived-experience content. |
| Brown et al 2020<br>39      | Review mobile app to support suicide prevention gatekeepers in Australia            | 2 participatory design workshops                                | 12 x Indigenous health workers and community workers                                           | Australia      | Change the term gatekeeper to responder which is a more culturally appropriate term. Combination of multiple support resources recommended e.g., mobile applications, social media and wallet cards, regular meetings. Recommend regular training for community members to include collaboration with community services.                                                                                                                                                                                                                                                                                                                                                                                                                                                                                                                                                                                                                                                                                                                                      |
| Bush et al 2015<br>60       | Proof-of-concept of virtual hope box (VHB) smartphone app                           | Phase 1 = VHB & development<br>Phase 2 = clinical field testing | 18 x high risk of self-harm veterans enrolled in Dialectical Behaviour Therapy (DBT) programme | USA            | Usable therapeutic tool to supplement face-to-face therapy. Limited by sample size and entirely descriptive analyses.                                                                                                                                                                                                                                                                                                                                                                                                                                                                                                                                                                                                                                                                                                                                                                                                                                                                                                                                          |

|                                |                                                                                                                     |                                                                                                                                                                  |                                                                                 |                                          |                                                                                                                                                                                                                                                                                                                                                                                                                                                                                                                                                                                                                                                                                                                                                                                          |
|--------------------------------|---------------------------------------------------------------------------------------------------------------------|------------------------------------------------------------------------------------------------------------------------------------------------------------------|---------------------------------------------------------------------------------|------------------------------------------|------------------------------------------------------------------------------------------------------------------------------------------------------------------------------------------------------------------------------------------------------------------------------------------------------------------------------------------------------------------------------------------------------------------------------------------------------------------------------------------------------------------------------------------------------------------------------------------------------------------------------------------------------------------------------------------------------------------------------------------------------------------------------------------|
| Cohen et al<br>2021<br>58      | Web-based support services for suicide prevention in young people and students                                      | Sequential cross-sectional mixed methods, user-informed review                                                                                                   | 9 x young people<br>4 x general practitioners<br>232 sites                      | UK                                       | 11 suicide-specific online help services out of 232. 17 sites included lived experiences accounts of suicidal stories provided as hope and recovery. 5 sites provided offline telephone hotline or email service. 4 sites provided active peer support. Clarity, brevity and immediacy most important facets for young people. Preference for text-based rather than verbal forms of communication. Few services provided peer support.                                                                                                                                                                                                                                                                                                                                                  |
| Bruen et al<br>2020<br>40      | Report the practicalities and acceptability of trialling digital technologies in an inpatient mental health setting | Interactions with a novel phone app: Strength Within Me and Fitbit for 7 days. Journaling and rating mood and creating safety plans. Option to include Facebook. | 79 x adult inpatients                                                           | United Kingdom                           | Natural language processing (NLP) using language from social media posts could identify people at risk of suicide. Facebook accentuated participants' distress when comparing their lives with family and friends on Facebook posts. 4G connectivity was essential for reliable and continuous access to the app and can help reduce barriers to face-to-face help-seeking, such as stigma and discomfort about discussing one's own mental health. Findings restricted to an inpatient population. The practical components of trialling a novel phone app within health services may be valuable for future research and health care organizations. Recommend app to include uplifting quotes, self-help links, an SOS (abbreviation for distress) button for helpful contact numbers. |
| Buscher et al<br>2020<br>23    | Does Cognitive Behaviour Therapy (CBT) target suicidal ideation                                                     | Systematic review and meta-analysis<br>6 x Randomised Control Trial (RCT)                                                                                        | 2 x studies = youth<br>4 x studies = adults                                     | Netherlands<br>USA, Australia<br>Belgium | Internet-based self-help interventions for suicide prevention considered a low-threshold treatment option to complement current services. Low number of included studies.                                                                                                                                                                                                                                                                                                                                                                                                                                                                                                                                                                                                                |
| Buus et al<br>2020<br>41       | Stakeholder perspectives on suicide prevention mobile phone app                                                     | Comparative thematic analysis of 4 focus groups using MYPLAN app for suicide prevention                                                                          | 4 x focus groups<br>5 x youth<br>8 x adults<br>3 x relatives<br>10 x clinicians | Denmark                                  | Flexibility of app allowed for tailored safety planning compared to the more static paper version. Use of Hope Box reported as innovative and helpful. Collaborative process supported the analyses' credibility. Context of participants' experiences important to included. Intense feelings of despair could make it impossible to engage with planned strategies. Took special effort to engage with app if person felt better.                                                                                                                                                                                                                                                                                                                                                      |
| Castillo-Sanchez et al<br>2019 | Review of mobile apps for suicide prevention                                                                        | Descriptive analysis<br>16 parameters                                                                                                                            | 16 x apps<br>Population not specified                                           | Canada<br>Scotland<br>Spain<br>UK        | Design and development of apps require support from health personnel to humanize them. Apps not updated regularly. Technical quality cannot be determined. 82% of apps in English language only. Most outstanding apps had an average of                                                                                                                                                                                                                                                                                                                                                                                                                                                                                                                                                 |

|                                |                                                                                                             |                                                                         |                                                                                                                                      |                                                                                                                                 |                                                                                                                                                                                                                                                                                                                                                                                                                                                                                                                                                                                                                                                                                                                                                                                                                                                                                                                                                                                                                                                                                                                                                                                        |
|--------------------------------|-------------------------------------------------------------------------------------------------------------|-------------------------------------------------------------------------|--------------------------------------------------------------------------------------------------------------------------------------|---------------------------------------------------------------------------------------------------------------------------------|----------------------------------------------------------------------------------------------------------------------------------------------------------------------------------------------------------------------------------------------------------------------------------------------------------------------------------------------------------------------------------------------------------------------------------------------------------------------------------------------------------------------------------------------------------------------------------------------------------------------------------------------------------------------------------------------------------------------------------------------------------------------------------------------------------------------------------------------------------------------------------------------------------------------------------------------------------------------------------------------------------------------------------------------------------------------------------------------------------------------------------------------------------------------------------------|
| 52                             |                                                                                                             |                                                                         |                                                                                                                                      | USA                                                                                                                             | 10,000 downloads. Only 3 apps had high value reviews: Stay Alive (201), Suicide Safety Plan (179), Virtual Hope Box (611). Non-inclusion of advertisements was useful and helped avoid detracting the person's concentration or overwhelming them. Virtual Hope Box met many of the parameters. Only app that offered 6 languages and highest number of downloads 10,000 and reviews 611. It is updated frequently. Omission of word suicide is notable and associated with negative emotions. Positive words such as hope is better option for suicide prevention. The Virtual Hope Box was developed at the National Centre for Tele-Health and Technology (US Department of Defence) and is based on the analogue version of the hope box concept, a therapeutic tool used by clinicians to help patients with depression or suicidal tendencies to redirect their negative thoughts toward reflecting on reasons for living instead. This app is particularly interesting because, based on the evaluated results, the technical elements of its use and design could be used in the development of similar apps. Low number of apps. User preference needs further investigation. |
| Chen & Chan<br>2022<br>21      | Review of effectiveness of digital health interventions (DHI) on unintentional injury, violence and suicide | Meta-analysis RCTs                                                      | 34 x articles<br>Population not specified                                                                                            | USA, Australia<br>Belgium,<br>Canada,<br>Germany<br>New Zealand<br>Sweden<br>Switzerland<br>Netherlands<br>UK, China, Sri Lanka | 18 articles examined effectiveness for reducing suicide. Majority of studies conducted in developed countries which reflects the digital divide among countries. DHI can be cost-effective and more accessible than traditional prevention programmes. Recommend policy makers should improve peoples' digital literacy.                                                                                                                                                                                                                                                                                                                                                                                                                                                                                                                                                                                                                                                                                                                                                                                                                                                               |
| De Jaegere et al<br>2019<br>17 | Evaluating the effectiveness of online treatment of suicidal ideation                                       | RCT of unguided web-based intervention<br>2 arm, parallel design RCT in | 18 years or older<br>Experienced suicidal ideation<br>Intervention group = 365<br>received access to unguided web-based intervention | Belgium                                                                                                                         | Online self-help intervention more effective in reducing suicidal ideation and symptoms than waitlist control group.                                                                                                                                                                                                                                                                                                                                                                                                                                                                                                                                                                                                                                                                                                                                                                                                                                                                                                                                                                                                                                                                   |

|                               |                                                                                                                                 |                                                                                                                                                                      |                                                                                           |                            |                                                                                                                                                                                                                                                                 |
|-------------------------------|---------------------------------------------------------------------------------------------------------------------------------|----------------------------------------------------------------------------------------------------------------------------------------------------------------------|-------------------------------------------------------------------------------------------|----------------------------|-----------------------------------------------------------------------------------------------------------------------------------------------------------------------------------------------------------------------------------------------------------------|
|                               |                                                                                                                                 | general population in Flanders                                                                                                                                       | Control group = 359 placed on a waitlist                                                  |                            |                                                                                                                                                                                                                                                                 |
| Dickter et al 2019<br>42      | Impact of online programme for depression and suicide intervention                                                              | Determine overall efficacy of CATCH-IT online programme for adolescent suicidal ideation and risk factors for suicide                                                | 83 x Adolescents<br>13 x primary care sites across four states<br>Age 14 -21 years        | USA                        | Higher self-esteem predicts lower suicidal ideation                                                                                                                                                                                                             |
| Dimeff et al 2021<br>18       | Feasibility, acceptability and effectiveness of Jaspr Health among suicidal adults in Emergency Departments (ED)                | Pilot RCT<br>Tablet-based app for direct use by patients which enables the delivery of 4 evidenced-based practices                                                   | 31 x adults acutely suicidal in ED<br>14 x randomised<br>17 x care as usual control group | USA                        | Advisory group with lived experience assisted in developing the research procedures to ensure acceptability of the research method. Significant decrease in distress and agitation and learning to cope more effectively for participants.<br>Small sample size |
| Dreier et al 2021<br>59       | Sharing insights involving people with lived experience of suicide in the development of an online suicide prevention programme | Sequential explanatory mixed methods design with three measurement points, pre, post, follow-up of programme 8 Lives – Lived experience reports and facts on suicide | 7 x Adults 18+ years old<br>Affected by suicide or are close to those affected            | Germany                    | Involving people with lived experience of suicide enriches research projects and can be empowering for the people involved and essential to create a credible programme.<br>Evaluation of the programme development could have been more standardized.          |
| Franco-Martin et al 2018<br>3 | Review of existing technology for suicide prevention                                                                            | Systematic review                                                                                                                                                    | 30 x studies on adolescents                                                               | English speaking countries | 51% = web technologies<br>22% = mobility solutions<br>12% = social networks<br>3% = machine learning<br>95 = others<br>Collaboration required among technologists, psychiatrists, patients and family members to advance the development of                     |

|                                |                                                                                           |                                                                                               |                                                                                                                |                                           |                                                                                                                                                                                                                                                                                                                                                                                                                                                     |
|--------------------------------|-------------------------------------------------------------------------------------------|-----------------------------------------------------------------------------------------------|----------------------------------------------------------------------------------------------------------------|-------------------------------------------|-----------------------------------------------------------------------------------------------------------------------------------------------------------------------------------------------------------------------------------------------------------------------------------------------------------------------------------------------------------------------------------------------------------------------------------------------------|
|                                |                                                                                           |                                                                                               |                                                                                                                |                                           | new technology-based solutions. Lack of studies on social networks. The use of technology mostly for training health professionals, families and patients. Those focused on adolescents have a greater acceptance of technologies.                                                                                                                                                                                                                  |
| Gibson et al<br>2019<br>53     | Young peoples' talk about suicide                                                         | Focus groups, social constructionist approach                                                 | 38 x young people aged 15-22 years, 9 x focus groups, not suicidal                                             | New Zealand                               | Unhealthy silence on suicide in the public domain. Support of online community allows young people to escape adult surveillance and stigma. Limited sample and not targeting more marginalized youth populations.                                                                                                                                                                                                                                   |
| Goldberg et al<br>2022<br>24   | Mobile phone interventions for mental health                                              | Systematic review                                                                             | 14 x meta-analyses of RCTs Adults, Adolescents                                                                 | Not identified                            | 1 x article focused on suicidal ideation. Text-messaging services outperformed non-specific controls. Results support the potential of mobile phone-based interventions.                                                                                                                                                                                                                                                                            |
| Gould et al<br>2021<br>54      | Effectiveness of Lifeline crisis interventions                                            | Pre and post-chat survey                                                                      | 6 x core centres<br>70% under 24 years of age<br>40% minors                                                    | USA                                       | 39,911 chats. Chatters reported being less suicidal than when they started the chat. 2/3rds were female.                                                                                                                                                                                                                                                                                                                                            |
| Hetrick et al<br>2018<br>43    | Youth co-design of mobile phone app for major depression, suicidal ideation and self-harm | 4 x co-design workshops with young people (design studio)<br>2 x focus groups with clinicians | 11 x young adults 18-25 years old experienced depression, suicidal ideation, self-harm.<br>16 x clinicians     | Australia                                 | Focus on positive approach with naming 'well-being tracker'. Brief personalised interventions between face-to-face appointments. App not designed for young people not engaged in face-to-face treatment. Issue to balance needs of young people with potential clinical burden. Need to intervene with young people in real time with acute risk of suicide rather than using the app as a digital diary.                                          |
| Hobson et al<br>2019<br>26     | Mobile health for First Nations populations                                               | Systematic review<br>13 studies                                                               | First Nations                                                                                                  | Canada<br>New Zealand<br>Australia<br>USA | Mental health and suicide prevention, particularly in the Australian context, were common themes (n=5). This is an important finding given the documented mental health challenges experienced by First Peoples of Australia, New Zealand, and the United States on account of intergenerational trauma. Scientific research is responding to the mental and emotional challenges faced by First Nations populations. Grey literature not included. |
| Josifovski et al<br>2022<br>44 | Text message and online brief contact intervention following self-                        | Non-randomised, single-arm intervention, mixed methods pilot study.                           | 13 x young adults and adults aged 16-65 years<br>Presented to Australian ED in previous 7 days of self-harm or | Australia                                 | Text messages well received indicating preferred method to be contacted. Significant reduction in number of self-reported self-harm episodes 12 months after presentation. High acceptability of 6 participants 12 months after. Small pilot, almost all female, no control group.                                                                                                                                                                  |

|                           |                                                                                                 |                                                                                                                                                      |                                                                                                                                                                                        |           |                                                                                                                                                                                                                                                                                                                                                                                                                           |
|---------------------------|-------------------------------------------------------------------------------------------------|------------------------------------------------------------------------------------------------------------------------------------------------------|----------------------------------------------------------------------------------------------------------------------------------------------------------------------------------------|-----------|---------------------------------------------------------------------------------------------------------------------------------------------------------------------------------------------------------------------------------------------------------------------------------------------------------------------------------------------------------------------------------------------------------------------------|
|                           | harm or suicide attempt                                                                         | Reconnecting After self-harm (RAFT)                                                                                                                  | suicide attempt and have Australian mobile phone                                                                                                                                       |           |                                                                                                                                                                                                                                                                                                                                                                                                                           |
| Kennard et al 2018<br>45  | App support inpatient intervention to prevent post-discharge suicidal behaviour for adolescents | Pilot study As Safe as Possible (ASAP) to reduce suicide attempts following hospital discharge<br>Randomised<br>3 x hour intervention inpatient unit | 2 x sites<br>66 x adolescents aged 12-18 years old hospitalised for suicidal ideation n=26<br>Or recent suicide attempt n=40                                                           | USA       | Participants reported high satisfaction, acceptability, feasibility with the intervention and app. Low rate of family engagement.                                                                                                                                                                                                                                                                                         |
| Kennedy et al 2020<br>46  | Digital intervention to reduce suicide stigma among farming men                                 | Adult learning model<br>Ripple Effect digital intervention website.                                                                                  | 169 x farming males aged 30-64 years. Personalise and tailored farming type, gender and experience of suicide. Post card messages, video stories, education and personal goal setting. | Australia | Majority of postcards and message's themes were growth, new realisations, hope and encouragement. Attitudinal and behaviour change with reduced stigma associated with mental health and suicide. Farmers have high level of suicide of suicide trajectory given their access to lethal means. Focus development on suicide safety planning targeting farmers. Maintaining engagement recommended for future development. |
| Kimberly et al 2017<br>47 | Usability, feasibility and acceptability of Crisis Care                                         | Web-based prototype of Crisis Care pilot-tested                                                                                                      | 20 x parents<br>20 x adolescents, 16 x females, 4 x males<br>Outpatient paediatric hospital                                                                                            | USA       | App has the capacity to reduce feelings of isolation and loneliness. High acceptability and usability by adolescents and parents. Helped connect adolescents to parents. Potential to enhance family-focused safety family procedures, intervention and treatment. Small sample size, predominately female.                                                                                                               |
| Kiosses et al 2021<br>48  | Emotion regulation tablet app for middle-aged and older adults at high suicide risk             | Feasibility and acceptability of two case studies<br>Use of WellPATH app. 12-week psychotherapy intervention                                         | 12 x middle aged and older adults 50 years and older<br>Suicidal ideation at discharge from hospital                                                                                   | USA       | WellPATH app feasible and accepted among middle-aged and older adults at high suicide risk. Reduced negative emotions and reinforced emotion regulation strategies.                                                                                                                                                                                                                                                       |
| Kreuze et al 2017<br>27   | Technology-enhanced suicide prevention interventions                                            | Systematic review<br>CDC Risk and Protective Factors<br>Ecological Model                                                                             | 16 x studies. Standalone or adjunct interventions delivered by mobile phone apps, text message, telephone, computer, web CD-ROM and video.                                             | USA       | Technology-enhanced approaches performed favourably for depressed mood, anxiety, hopelessness and negative automatic thoughts. Telephone management reduced suicidal thoughts, suicide re-attempts and suicide mortality.                                                                                                                                                                                                 |



|                                   |                                                                                                       |                                              |                                                                                                                                                                                                                                                                                                                                                          |                                                                      |                                                                                                                                                                                                                                                                                                                                                                 |
|-----------------------------------|-------------------------------------------------------------------------------------------------------|----------------------------------------------|----------------------------------------------------------------------------------------------------------------------------------------------------------------------------------------------------------------------------------------------------------------------------------------------------------------------------------------------------------|----------------------------------------------------------------------|-----------------------------------------------------------------------------------------------------------------------------------------------------------------------------------------------------------------------------------------------------------------------------------------------------------------------------------------------------------------|
|                                   |                                                                                                       |                                              | Population not specified                                                                                                                                                                                                                                                                                                                                 |                                                                      | Technology-enhanced interventions was more affordable than face-to-face interventions alone and reduced stigma.                                                                                                                                                                                                                                                 |
| Lai et al, 2014<br>31             | Review of web-based suicide prevention                                                                | Literature review                            | 15 x articles<br>All populations                                                                                                                                                                                                                                                                                                                         | Not specified                                                        | Three key factors assist with web-based suicide prevention strategies: ease of accessibility, degree of anonymity and text-based communication. Web-based approaches advantages due to stigma, physical/psychological limitations or geographical location and cost-effective. Issues of confidentiality, safety in an acute crisis.                            |
| Martinengo et al 2019<br>28       | Adherence to clinical guidelines for suicide prevention and depression apps                           | Systematic review                            | 69 x apps<br>General population<br>Students<br>Veterans                                                                                                                                                                                                                                                                                                  | Australia<br>Spain, UK<br>USA<br>New Zealand<br>Canada<br>Bangladesh | Only 5 of the depression and suicide prevention apps offered the 6 suicide prevention strategy domains. Failure of Apple and Google app stores and health app industry in self-governance, quality and safety assurance. Risks and benefits to users' needs to be identified. 34 apps belonged to Health and Fitness category and 14 14 categorised as medical. |
| Martinez-Miranda et al 2019<br>49 | Acceptability of mobile-based conversational agent for prevention and detection of suicidal behaviour | Exploratory pilot for virtual agent, HelPath | 12 x participants aged 20-53 years old, Past suicidal behaviour/ideation/planning or attempt                                                                                                                                                                                                                                                             | Mexico                                                               | 60% of participants reported emotional competence and adherence. Appearance and voice of avatars required improvement to reflect users.                                                                                                                                                                                                                         |
| Meier et al 2022<br>61            | SERO – Mobile app for suicide prevention                                                              | Proof-of-concept SERO app to                 | Focus groups<br>Health professionals, people with illness experience and relatives to test 6 strategies for suicide prevention:<br>1 Tracking mood or suicidal thoughts<br>2 Safety plan development<br>3 offer activities to deter suicidal thoughts<br>4 Information an education<br>5 Access to support networks<br>6 Access to emergency counselling | Switzerland                                                          | Potential for self-management, self-assessment and self-reflection. Limitations with app considered a medical device and requires further funding to meet legal regulations.                                                                                                                                                                                    |

|                             |                                                                                                                      |                                                                                                                     |                                                                                                                         |               |                                                                                                                                                                                                                                                                                                                                                                 |
|-----------------------------|----------------------------------------------------------------------------------------------------------------------|---------------------------------------------------------------------------------------------------------------------|-------------------------------------------------------------------------------------------------------------------------|---------------|-----------------------------------------------------------------------------------------------------------------------------------------------------------------------------------------------------------------------------------------------------------------------------------------------------------------------------------------------------------------|
| Milne-Ives et al 2022<br>32 | Artificial intelligence and machine learning in mobile apps for mental health                                        | Scoping review                                                                                                      | 4 x articles<br>Population not specified                                                                                | UK<br>USA     | Importance of maintaining user engagement. Sample size small                                                                                                                                                                                                                                                                                                    |
| Morgieue et al 2020<br>50   | Use of EMMA app                                                                                                      | Case report study<br>Ecological Mental Momentary Assessment (EMMA)<br>Longitudinal Clinical assessment 1,3,5 months | 14 x participants<br>Presence of mental disorders and suicidal thoughts and behaviours.                                 | France        | Recommend integrating EMMA into existing emergency procedures. Interpret co-design as being consulted early and through focus groups, not in publication.                                                                                                                                                                                                       |
| O'Grady et al 2020<br>55    | Develop SafePlan app for suicide prevention                                                                          | Focus groups<br>Survey                                                                                              | 15 x mental health care professionals<br>18 x secondary school students aged 14-16 years                                | Ireland       | Ready for trialing. Core function to provide interactive safety plan for people with suicidal thoughts/ behaviours as an adjunct to face-to-face therapy. High acceptability and usability. No automated warning to inform people when they should consider seeking professional help.                                                                          |
| O'Toole et al 2019<br>19    | App-assisted treatment for suicide prevention                                                                        | Compare treatment                                                                                                   | 129 x adults aged 18-65 years<br>Outpatient suicide prevention clinic Treatment as usual with app = 69 and without = 69 | Denmark       | Group receiving treatment as usual in combination with access to mobile app experienced a smaller decrease in self-reported suicide risk immediately following treatment.                                                                                                                                                                                       |
| Pospos et al 2017<br>29     | Web-based tools and apps to mitigate burnout, depression and suicidality among healthcare students and professionals | Systematic review                                                                                                   | 36 x articles<br>14 x web based tools<br>22 x mobile applications<br>Healthcare students only                           | Not specified | No inclusion of health professionals.<br>2 focused on suicide prevention: Virtual Hope box (improves users' ability to cope with unpleasant thoughts and emotions) & Stay Alive (customized safety plan, breathing & grounding exercise tutorials. Online discussion forum, links to other resources). Recommend applying user-centred design for future tools. |
| Primack et al 2021<br>56    | Feasibility and acceptability of mobile app for the prevention of suicide                                            | Mobile Application for the Prevention of Suicide (MAPS)<br>Semi-structured interviews                               | 8 x veterans<br>2 weeks post-treatment from psychiatric facility                                                        | USA           | Ability to address suicide risk in real time. Intended to adjunct to therapy rather than stand-alone treatment. High rating of acceptability. Participants would use it again and recommend to a friend. Ability to help users to understand themselves and their emotions.                                                                                     |

|                                  |                                                                    |                                                                                                        |                                                                                 |                |                                                                                                                                                                                                                                                                                                                                                                                                                                                                                                                                                                                        |
|----------------------------------|--------------------------------------------------------------------|--------------------------------------------------------------------------------------------------------|---------------------------------------------------------------------------------|----------------|----------------------------------------------------------------------------------------------------------------------------------------------------------------------------------------------------------------------------------------------------------------------------------------------------------------------------------------------------------------------------------------------------------------------------------------------------------------------------------------------------------------------------------------------------------------------------------------|
| Rassy et al<br>2021<br><br>33    | Information and communication technology use in suicide prevention | Scoping review                                                                                         | 115 studies<br>Population not specified                                         | Not identified | ICT play a major role in suicide prevention however large-scale evaluation studies are needed to further examine their effectiveness. 10 studies referred to universal suicide prevention strategies using health promotion through educational websites and awareness campaigns. ICT may provide a sense of being connected to people who are otherwise isolated and reluctant to use offline services. Algorithms helped identify individuals at risk of suicide, but a clinical application of these algorithms is yet to be developed.                                             |
| Reen et al<br>2022<br><br>34     | Mobile apps for suicide prevention and privacy policies            | Ascertain the efficacy of mobile intervention in preventing suicide & investigating privacy strategies | 35 x apps<br>41 x articles<br>Population not specified                          | Not specified  | Lack of research on how users' privacy is managed. Recommend more interactive apps and apply user-centre design approach.                                                                                                                                                                                                                                                                                                                                                                                                                                                              |
| Rice et al<br>2016<br><br>35     | Implementation and moderation of online suicide intervention       | Review of online and social media suicide intervention studies                                         | 3 x online and social media intervention studies of adolescents 14-25 year olds | Australia      | Moderation of interventions are required to monitor adolescents' behaviours online.                                                                                                                                                                                                                                                                                                                                                                                                                                                                                                    |
| Rozek et al<br>2020<br><br>20    | Machine learning to predict suicide attempts in the military       | Secondary data analysis of RCT testing the efficacy of CBT treatment compared to treatment as usual.   | 152 x Veterans<br>76 = CBT<br>76 = Treatment as usual                           | USA            | Small sample size. Inconclusive findings.                                                                                                                                                                                                                                                                                                                                                                                                                                                                                                                                              |
| Varzgani et al<br>2021<br><br>63 | Review of suicide prevention through smartphone applications       | Systematic review                                                                                      | 30 x articles<br>All populations                                                | Not specified  | Categorised features are user engagement, safety planning, helplines and support, coping strategies, self-assessment. Most apps are not sustained over time because of the lack of engagement features. 3 apps used Imaginator, LifeApp engagement such as notifications, alerts, reminders Imaginator added gamification and a reward badge system, points, avatars. 2 apps, SafePlan and BeyondNow allowed sharing of safety plans with family or support network. BeyondNow app provided video outlining practice of safety planning. All apps included emergency helplines. MyPlan |

|                                 |                                                                                       |                                                                                                                                       |                                          |                                                |                                                                                                                                                                                                                                                                                                                                                                                                                                                                                                                                                                                                                                                                                                                                                                                                    |
|---------------------------------|---------------------------------------------------------------------------------------|---------------------------------------------------------------------------------------------------------------------------------------|------------------------------------------|------------------------------------------------|----------------------------------------------------------------------------------------------------------------------------------------------------------------------------------------------------------------------------------------------------------------------------------------------------------------------------------------------------------------------------------------------------------------------------------------------------------------------------------------------------------------------------------------------------------------------------------------------------------------------------------------------------------------------------------------------------------------------------------------------------------------------------------------------------|
|                                 |                                                                                       |                                                                                                                                       |                                          |                                                | included locating nearest emergency department. 10 apps had distraction feature provided music, games, mindfulness exercises, stories and videos. 6 apps provided suicidal thought tracking with self-reported scales, questionnaires, therapy sessions with experts. Limited with some apps including therapy and some were stand alone.                                                                                                                                                                                                                                                                                                                                                                                                                                                          |
| Povey et al<br>2016<br><br>57   | Explore Aboriginal and Torres Strait Islander experiences of two apps                 | Qualitative study<br>2 culturally responsive e-mental health apps, 3 x focus groups, ibobly and AIMHi apps                            | 9 x Aboriginal community members         | Australia                                      | Acceptability of apps for people with less severe mental illnesses. Motivation, technological competence and literacy likely to influence acceptability. Clinician support to use apps recommended. Apps complement rather than replace face-to-face services. Culturally relevant language and graphics. Balance between security and usability. Small sample size from one location.                                                                                                                                                                                                                                                                                                                                                                                                             |
| Robinson et al<br>2015<br><br>6 | Social media and suicide prevention                                                   | Systematic review                                                                                                                     | 30 x studies<br>Population not specified | Australia                                      | Social media platforms can reach large numbers of otherwise hard-to-reach people. Acceptability of providing an anonymous, accessible and non-judgmental forum. Sites generally governed by an ethical code of conduct and successfully moderated by trained volunteers who received professional supervision. Users used platforms to seek peer support as opposed to professional support. Very few people used the sites to seek information about suicide methods or suicide partners. Challenges with controlling user behaviour, accurately assessing risk, privacy and confidentiality. Platforms as opposed to offline help and support could further marginalize people from mainstream society. Possibility of normalising of suicide-related behaviour as a response to one's problems. |
| Tighe et al<br>2017<br><br>64   | Evaluate the effectiveness of a self-help mobile app (ibobbly) for suicide prevention | Pilot randomised control trial<br>Randomised to receive acceptance-based therapy over 6 weeks (through app) or waitlisted for 6 weeks | 61 x Aboriginal adults aged 18-35 years  | Remote and very remote North-western Australia | Apps for suicide prevention reduce distress and depression but do not show significant reductions on suicide ideation or impulsivity. 16 participants did not have suicide ideation as a baseline making it difficult to demonstrate a significant effect in a small sample.                                                                                                                                                                                                                                                                                                                                                                                                                                                                                                                       |

| Torous et al<br>2018<br>50      | Assess whether technology-based solutions reduce suicide                                               | Clinical review of smartphones, sensors and machine learning | Mental Health clinicians                                                                                                                                                                            | Not applicable                                                    | Apple App Store and Google Play store targeting suicide prevention are not evidence based and few have been clinically validated. Apps need to augment care and never to fragment care. Majority of apps are never opened more than once. Little data on use of smartphone apps for child and adolescent populations as concerns about privacy, legal and efficacy. Dearth of research on digital tools for suicide prevention in older adults. Considering that older adults are at the highest risk for death by suicide, there is an even greater need to offer new effective tools for this population. |
|---------------------------------|--------------------------------------------------------------------------------------------------------|--------------------------------------------------------------|-----------------------------------------------------------------------------------------------------------------------------------------------------------------------------------------------------|-------------------------------------------------------------------|-------------------------------------------------------------------------------------------------------------------------------------------------------------------------------------------------------------------------------------------------------------------------------------------------------------------------------------------------------------------------------------------------------------------------------------------------------------------------------------------------------------------------------------------------------------------------------------------------------------|
| Torok et al<br>2020<br>7        | Does direct and indirect digital interventions effective in reducing suicidal ideation and behaviours. | Systematic review and meta-analysis                          | 16 x studies<br>10 x direct interventions<br>6 x indirect interventions<br>All populations                                                                                                          | Belgium, USA, Australia, Netherlands, Germany                     | Self-guided digital interventions directly targeting suicidal ideation are effective immediately post-intervention. Indirect interventions were not significant. Digital interventions should be promoted and disseminated widely, especially where there is a lack of, or minimal access to health services. Overall effect size of interventions is small, the population impact could be significant.                                                                                                                                                                                                    |
| Witt et al<br>2017<br>52        | Online and mobile apps for self-management of suicidal ideation and self-harm                          | Systematic review and meta-analysis                          | 7 x databases<br>14 x non-overlapping studies<br>3,356 x participants                                                                                                                               | Australia, USA<br>Germany<br>Netherlands<br>Sweden<br>Switzerland | Digital interventions associated with reductions for suicidal ideation scores at post-intervention. No evidence of a treatment effect for self-harm or attempted suicide. Only 5 developed specifically for self-management of suicidal ideation. Only 1 developed for the self-management of self-harm.                                                                                                                                                                                                                                                                                                    |
| <b>Grey Literature</b>          |                                                                                                        |                                                              |                                                                                                                                                                                                     |                                                                   |                                                                                                                                                                                                                                                                                                                                                                                                                                                                                                                                                                                                             |
| Author/Year                     | Methods/Analysis                                                                                       | Countries                                                    | Outcome/Limitations                                                                                                                                                                                 |                                                                   |                                                                                                                                                                                                                                                                                                                                                                                                                                                                                                                                                                                                             |
| Payrus<br>62                    | N/A                                                                                                    | UK                                                           | Self-harm prevention and suicide prevention focus. Trustees experience suicide with family members. Not clear if youth are actively involved in co-design of services or website.                   |                                                                   |                                                                                                                                                                                                                                                                                                                                                                                                                                                                                                                                                                                                             |
| Samaritans<br>2018 - 2019<br>65 | Service Review                                                                                         | International                                                | Reviewed their services and launched a text service (SHOUT) in 2019 and a suicide prevention website (StayingSafe) in 2018. Consulted people with lived experience, video footage and safety plans. |                                                                   |                                                                                                                                                                                                                                                                                                                                                                                                                                                                                                                                                                                                             |

|                                                              |                |                        |                                                                                                                                                                                                                                                       |
|--------------------------------------------------------------|----------------|------------------------|-------------------------------------------------------------------------------------------------------------------------------------------------------------------------------------------------------------------------------------------------------|
| Facebook<br>2017<br><br>66                                   | Service Review | International          | Artificial Intelligence (AI) commenced to detect suicidal posts before they are reported. Only liaised with mental health experts and not service users.                                                                                              |
| Save.org<br><br>67                                           | N/A            | USA, UK, India, Canada | Focused on raising public awareness and education. Not clear if co-design of services or website occurred.                                                                                                                                            |
| National<br>Suicide<br>Prevention<br><br>68                  | N/A            | UK                     | Work with a network of organisations and individuals in suicide prevention. Focused on raising public awareness and education. Not clear if co-design of services or website occurred.                                                                |
| Lifeline<br><br>69                                           | N/A            | International          | Crisis response helpline. Provided in different languages with option to phone a trained counsellor. Not clear if co-design of services or website occurred.                                                                                          |
| Forefront<br><br>70                                          | N/A            | USA                    | Focused on raising public awareness and education in schools, higher education, workplaces and communities. Not clear if co-design of services or website occurred.                                                                                   |
| Mental Health<br>& Wellbeing<br>Commission<br>2021<br><br>71 | N/A            | New Zealand            | Focused on raising public awareness and education. Created by the government after an enquiry into mental health and addiction. Some involvement with people with lived experience at governance level.                                               |
| Beyond Blue<br><br>72                                        | N/A            | Australia              | Focused on raising public awareness and education on anxiety, depression and suicide. Safety planning app available to download from website. Phone and chat options with trained counsellor. Not clear if co-design of services or website occurred. |

## 155 Stage Five: Collating, summarizing and reporting the results

156 This scoping study aimed to present an overview of material reviewed which is not synthesised as is  
157 the case with a systematic review. While this study followed an analytic framework, we did not  
158 attempt to present a view regarding the weight of evidence. The results therefore did not seek to  
159 assess the quality of evidence and cannot determine if the findings are generalizable. Having charted  
160 the data, however, we were able to present our findings in a narrative format after organising the data  
161 according to study characteristics (Table 3) and themes (Table 4).

162 DW reviewed the first iteration of themes according to the inclusion criteria and analysed iteratively  
163 the emerging categories from the published and grey literature. MN analysed the emerging themes  
164 and referred to the full text where required. DW and MN worked together to simplify the descriptions  
165 and identified fuller commonalities according to the study characteristics and five themes. A final  
166 review was provided by the rest of the research team to confirm the results.

167

## 168 Results

### 169 Study characteristics of the included studies

170 Table 3 provides an overview of the study characteristics. There were several study types from the 52  
171 published articles including four randomized control trials [17-20], one meta-analysis of randomised  
172 control trials [21], one clinical review [22], four systematic review and meta-analysis [4, 7, 23, 24], nine  
173 systematic reviews [3, 5, 6, 25-29, 63], one mixed methods [30], five literature or scoping reviews [31-  
174 35], two integrative reviews [36- 37], thirteen pilots or trials [38- 50], seven qualitative studies [51-  
175 57], two sequential cross-sectional mixed methods (58- 59) and two proof-of-concept [60-61].

176 The following demographics were noted from the published and grey literature. 7 x articles identified  
177 young people specifically ranging from 14- 22 years old [35, 42- 43, 47, 53, 58- 59]. 1 x website  
178 targeted youth [62] and 1 x article focused on young females [54]. 6 x articles focused on young people  
179 alongside adults, carers, parents and/or healthcare professionals [12, 23, 28, 45, 49, 55]. Adults were  
180 identified within 6 articles with an age range from 24-61 years [5, 38, 40, 51, 59]. Two articles  
181 specifically discussed adult males [37, 46].

182 Older adults aged over 50 years were discussed in one article [48]. Veterans were discussed in four  
183 articles [20, 28, 56, 60]. Ethnicity was focused on the experiences of Indigenous cultures within 5  
184 articles from Australia, New Zealand, Canada and USA [26, 39, 57, 59, 64]. 16 published articles and 8  
185 items of grey literature did not specify which populations the authors were targeting, or it was implied  
186 that all populations were included [21, 25, 27, 29-34, 36, 38, 50-52, 65-72].



187  
188

Table 3. Study characteristics of included data.

| <b>Author</b>                         | <b>Study type</b>                                                     |
|---------------------------------------|-----------------------------------------------------------------------|
| [17–20]                               | Randomised control trials (RCT)                                       |
| [21]                                  | Meta-analysis of randomised control trials                            |
| [22]                                  | Clinical review                                                       |
| [4], [7], [23-24]                     | Systematic review and meta-analysis                                   |
| [3], [5-6], [25-29], [63]             | Systematic review                                                     |
| [30]                                  | Mixed methods                                                         |
| [31-34]                               | Literature review / scoping review                                    |
| [36-37]                               | Integrative review                                                    |
| [38-50]                               | Pilots / trials                                                       |
| <b>Author</b>                         | <b>Demographics</b>                                                   |
| [35], [42-43], [47], [53], [58], [59] | Young people aged 14-22 years old                                     |
| [62]                                  | Youth                                                                 |
| [54]                                  | Young females                                                         |
| [12], [23], [28], [45], [49], [55]    | Young people, adults, carers, parents and/or healthcare professionals |

|                                                               |                                                        |
|---------------------------------------------------------------|--------------------------------------------------------|
| [5], [38], [40], [51], [59]                                   | Adults aged 24-61 years old                            |
| [37], [46]                                                    | Adult males                                            |
| [48]                                                          | Older adults aged over 50 years old                    |
| [20], [28], [56], [60]                                        | Veterans                                               |
| [26], [39], [57], [59], [64]                                  | Ethnicity focus on Indigenous cultures                 |
| [21], [25], [27], [29], [30-34], [36], [38], [50-52], [65-72] | Not specified or implied all populations were included |

## 190 Theme One: Acceptability by users

191 Table 4 provides an overview of the five themes that emerged from the 52 peer reviewed articles and  
192 9 items from grey literature. We found the first theme of *acceptability by users* was prominent from  
193 the published literature (n=19). The articles either examined acceptability of digital tools for suicide  
194 prevention explicitly or it emerged as a key finding [5-6, 18, 23-24, 35-40, 45, 47-49, 54-57].  
195 Interestingly, almost half of the 19 items (n=9) specifically reviewed suicide prevention and self-injury  
196 apps to establish if users found them acceptable [5, 18, 40, 45, 47-48, 55- 57]. The remaining published  
197 literature focused on text messaging services [6, 35] or involved systematic reviews of social media  
198 platforms and mobile phone-based interventions [6, 24, 36]. Only one article reviewed the chat  
199 function on the Samaritan's website, a major non-government organisation that has a long history of  
200 providing suicide prevention services [54].

## 201 Theme Two: Future inclusion of experts-by-experience

202 The second theme identified from 12 articles located in the published literature recommended the  
203 *future inclusion of experts-by-experience* [3, 5, 26, 29, 30, 32, 34, 37, 39, 46, 50, 51]. One item from  
204 grey literature also emerged within this theme [65]. The terminology and ways to involve experts-by-  
205 experience varied among the literature. For example, involving people with *lived experience* in the  
206 design of interventions and trials was specifically highlighted in four studies [5, 26, 30, 65]. *Codesign*,  
207 *coproduction*, *user-centred design* and *collaboration* were terms used in five studies where the  
208 emphasis was on end-to-end input, albeit in a generalised format [29, 34, 37, 39, 51]. To a lesser  
209 extent, the importance of *user engagement* or *focus groups* was recommended in three studies [32,  
210 46, 50] and one study specifically recommended targeting *adolescents* whom the authors argued have  
211 a greater acceptance of technologies [3]. Interestingly, given that the recommendations from these  
212 articles were to include experts-by-experience within health research, we found it surprising that such  
213 recommendations were identified and not followed through by the authors themselves. We found  
214 one exception where the Samaritans' website was reviewed from 2017-2019 [65]. The review

215 involved repackaging the Samaritans' web-based services and text service, SHOUT. Following  
216 consultation with people with lived-experience a new website (StayingSafe) included strategies for  
217 developing a safety plan and lived-experience video footage. The review found that it was important  
218 to continue evaluating developments and identify models of effective help provision. In addition, it  
219 was noted that users should be involved not only in such evaluation, but also as co-producers of new  
220 online materials and approaches.

### 221 **Theme Three: Inconsistent use of Patient and Public Involvement (PPI)**

222 Patient and Public Involvement (PPI) in research is defined as 'Research being carried out *with* or *by*  
223 members of the public rather than *to*, *about* or *for* them' [73]. Notwithstanding, *the Inconsistent use*  
224 *of PPI theme* emerged from 19 published articles where the authors were unclear about the purpose  
225 and role of PPI [18-19, 25, 41, 43-49, 53, 55-58, 61, 64]. Furthermore, Facebook, a major online  
226 networking site, stated that their company liaised with mental health experts (not service users) and  
227 considered this type of consultation met the requirements of PPI research [66]. None of the data from  
228 the published and grey literature identified PPI as co-authors and used a variation of terms to imply  
229 codesign methodology. For example, PPI were involved passively during the final stages of usability  
230 testing for digital tools [25], the middle of the research as user-informed participants [58], part of a  
231 collaborative process to support the analysis [41], as members of focus groups or advisory groups [18,  
232 43, 53, 55, 57, 59, 61], pilot studies or prototypes [19, 44-47, 49, 56, 64] and case studies [48].

### 233 **Theme Four: Digital technology tools to supplement face-to-face**

#### 234 **therapy**

235 The theme of *digital technology tools as a supplement to face-to-face therapy*, emerged from 20  
236 articles within the published literature [7, 17, 19, 20, 23, 28, 33, 35-36, 38, 42-43, 50, 52, 55-57, 60,  
237 63-64]. From within this theme, four articles found that self-guided digital tools were most effective  
238 immediately post-intervention [17, 19, 38, 50]. It was not clear however if the effectiveness continued

239 once the studies were complete and the digital tools such as tablets and mobile phones were returned  
240 to the researchers. Four articles noted that low threshold treatments were successful as a  
241 complement face-to-face therapy [20, 23, 57, 64]. People that were considered actively at high risk  
242 of suicide were not included in the studies. Websites and platforms such as Facebook were reviewed  
243 where clinical applications of algorithms were recommended as a future requirement to identify  
244 suicide risk [28, 33]. As a high risk group of suicide, moderation of digital interventions were  
245 recommended in three studies particularly for adolescents [35, 42-43] and engagement with clinical  
246 practice is still required [17, 36, 52, 55-56, 60, 63]. Although the articles recommend digital  
247 intervention as part of model of care, 9 articles involved limited sample sizes and were not  
248 generalizable [38, 60, 23, 52, 56, 20, 57, 64, 7].

## 249 Theme Five: Digital Divide

250 The digital divide is the gap that exists between individuals who have access to modern information  
251 and communication technology and those who lack access [74]. Although only three articles were  
252 included within the theme of *digital divide*, we felt its impact required attention as disparities  
253 associated with access, geography and income were identified [21, 32, 40].

254 One article noted that 4G connectivity was essential for reliable and continuous access to the  
255 applications [40]. Those on low incomes tended to use 2G and 3G technology that did not require  
256 smartphones and relied on text messaging services. Similarly, a second article found that technology-  
257 enhanced interventions such as telephone management were more affordable than face-to-face  
258 interventions and reduced stigma [32]. Furthermore the majority of research on digital technology  
259 and suicide prevent was conducted in First-world countries, which excluded less developed countries  
260 [21]. Recommendations include policy makers improving peoples' digital literacy and inclusion of  
261 research with more countries on a global scale [21].

262

263 Table 4. Narrative grouping of data into themes.

| Author                                                                | Theme                                                                  |
|-----------------------------------------------------------------------|------------------------------------------------------------------------|
| <b>Theme 1: Acceptability by users</b>                                |                                                                        |
| [5], [18], [40], [45], [47-48], [55- 57]                              | Suicide prevention and self-injury apps                                |
| [6], [35]                                                             | Text messaging services                                                |
| [6], [24], [36]                                                       | Social media platforms and mobile phones                               |
| [54]                                                                  | Chat function                                                          |
| <b>Theme 2: Future inclusion of experts-by-experience</b>             |                                                                        |
| [3]                                                                   | Adolescents and greater acceptance of technologies                     |
| [5], [26], [30], [65]                                                 | Lived experience in design of interventions and trials                 |
| [32], [46], [50]                                                      | Importance of user engagement or focus groups                          |
| [29], [34], [37], [39], [51]                                          | Codesign, coproduction, collaboration, user centred                    |
| <b>Theme 3: Inconsistent use of Public, Patient Involvement (PPI)</b> |                                                                        |
| [66]                                                                  | Consulted mental health experts and not service users                  |
| [25]                                                                  | Final stages of usability testing                                      |
| [58]                                                                  | Middle stage of research as user-informed                              |
| [41]                                                                  | Collaborate to support the analysis                                    |
| [18], [43], [53], [55], [57], [59], [61]                              | Members of focus groups or advisory groups                             |
| [19], [44-47], [49], [56], [64]                                       | Pilot studies or prototypes                                            |
| [48]                                                                  | Case studies                                                           |
| <b>Theme 4: Digital tools to supplement face-to-face therapy</b>      |                                                                        |
| [17], [19], [38], [50]                                                | Self-guided digital tools most effective immediately post-intervention |
| [20], [23], [57], [64]                                                | Low threshold treatment complement face-to-face therapy                |
| [28], [33]                                                            | Clinical applications of algorithms to identify suicide risk required  |
| [35], [42-43]                                                         | Moderation of interventions required for adolescents                   |
| [17], [36], [52], [55-56], [60], [63]                                 | Engagement still required with clinical practice                       |
| <b>Theme 5: Digital Divide</b>                                        |                                                                        |
| [40]                                                                  | 4G connectivity essential                                              |
| [21]                                                                  | Majority of research in developed countries                            |
| [32]                                                                  | More affordable and reduced stigma                                     |

264

## 265 Stage Six: Stakeholder consultation

266 The experts-by-experience members of this project are part of the university's PPI group and regularly  
267 provide input into programmes or research. The group were approached by the primary researcher  
268 to be part of the project and were paid as per the National Institute of Health and Care Research  
269 guidelines [73]. The members met on a monthly basis to review the articles and the chairperson meet  
270 with the primary researcher in between meetings. All members have been identified on funding  
271 applications, publications and conference presentations.

## 272 Discussion

273 This scoping review was the first to explore what is known about codesign, digital tools and suicide  
274 prevention. Our findings highlighted the disconnect between developers, researchers and experts-by-  
275 experience understanding and acceptability of the digital health tools. For example, none of the  
276 published articles were clear about codesign as a methodology and end users were only included  
277 passively through focus groups, advisory groups, or during the testing stage of pilot studies or  
278 prototypes. Despite the initial engagement of experts-by-experience with digital tools for suicide  
279 prevention immediately after an intervention, the removal of regular monitoring by health  
280 professionals once trials were completed, contributed to lack of data to confirm ongoing success.

281 Supplementation of digital solutions in partnership with face-to-face therapy will increase especially  
282 for digital natives such as adolescents. The ethical concerns over how younger populations will have  
283 their privacy safeguarded is an area that is yet to be developed more fully within the literature. The  
284 digital divide is noteworthy as a future concern as countries such as the United Kingdom are phasing  
285 out 2G and 3G networks in 2023 to make room for faster 5G networks [75]. The implications for those  
286 on low incomes and experiencing mental distress may not be visible to the general public as access to  
287 digital platforms in the future will require uninterrupted connectivity through smartphones and  
288 internet access.

## 289 Limitation

290 A limitation of this scoping review is the exclusion of literature that was not written in the English  
291 language. Based on feedback on our scoping protocol, we extended our search to include countries  
292 from the European Union and countries such as China, Japan and Sri Lanka. The search criteria would  
293 be extended to non-English articles for future reviews.

## 294 Conclusion

295 When we conducted this scoping review from a codesign perspective, we were surprised by the lack  
296 of literature published and unpublished, that also followed the same methodology. We believe our  
297 findings will support future researchers and developers to implement codesign that maintains the  
298 integrity of their project. Authentic involvement requires experts-by-experience as co-authors and  
299 end-to-end partners from design, implementation and evaluation of digital health tools for suicide  
300 prevention.

## 301 Supporting information

302 **S1 Table. Population, Concept, Context Search String.**  
303 (DOCX)

304 **S2 Table. Data Extraction.**  
305 (DOCX)

306 **S3 Table. Study characteristics of included data.**  
307 (DOCX)

308 **S4 Table. Narrative grouping of data into themes.**  
309 (DOCX)

310 **S1 Figure. PRISMA flow diagram for included searches of databases and grey literature.**  
311 (DOCX)



## 312 Acknowledgments

313 We acknowledge the support and guidance from Simon Couth, The Working Academy, Academic  
314 Librarians and members of the expert-by-experience group.

## 315 Author Contributions

316 **Conceptualisation:** Dianne Wepa

317 **Investigation:** Dianne Wepa, Martin Neale, Waseem Abo-Gazala, Sally Cusworth, Jae Hargan, Manoj  
318 Mistry, Jimmy Vaughan, Stephen Giles, Mehnaz Khan

319 **Methodology:** Dianne Wepa, Martin Neale, Waseem Abo-Gazala

320 **Formal analysis:** Dianne Wepa, Martin Neale

321 **Writing – original draft:** Dianne Wepa

322 **Writing – reviewing & editing:** Dianne Wepa, Martin Neale, Waseem Abo-Gazala, Sally Cusworth,  
323 Jae Hargan, Manoj Mistry, Jimmy Vaughan, Stephen Giles, Mehnaz Khan

## 324 References

- 325 1. World Health Organization. Suicide [Internet]. 2022 [cited 2023 March 31]. Available from  
326 <https://www.who.int/news-room/fact-sheets/detail/suicide>
- 327 2. Survivors of bereavement by suicide. Support after a suicide booklet. 2023 [cited 2023 March 31].  
328 [Available from https://uksobs.org/resources-for-survivors/support-after-a-suicide-booklet](https://uksobs.org/resources-for-survivors/support-after-a-suicide-booklet)
- 329 3. Franco-Martin M, Munoz-Sanchez A, Sainz-de-Abajo J, Castillo-Sanchez L, Hamrioui B, Torre-Diez G.  
330 A Systematic Literature Review of Technologies for Suicidal Behaviour Prevention. Journal of  
331 Medical Systems. 2018; 42(4):1-7. Available from: <https://doi.org/10.1007/s10916-018-0926-5>
- 332 4. Witt K, Spittal MJ, Carter G, Pirkis J, Hetrick S, Currier D, et al. Effectiveness of online and mobile  
333 telephone applications (apps) for the self-management of suicidal ideation and self-harm: a  
334 systematic review and meta-analysis. BMC Psychiatry. 2017; 17(297):1-18. Available from:  
335 <https://doi.org/10.1186/s12888-017-1458-0>
- 336 5. Arshad U, Farhat A, Gauntlett J, Husain N, Chaudhry N, Taylor PJ. A Systematic Review of the  
337 Evidence Supporting Mobile and Internet Based Psychological Interventions for Self-Harm.  
338 Suicide & life-threatening behaviour. 2020;50:151-179. Available from:  
339 <https://doi.org/10.1111/sltb.12583>
- 340 6. Robinson J, Georgina C, Bailey E, Hetrick S, Rodrigues M, Fisher S, et al. Social media and suicide  
341 prevention: a systematic review. Early Intervention in Psychiatry. 2016; 10:103-12. Available from:  
342 <https://doi.org/10.1111/eip.12229>
- 343 7. Torok M, Han J, Baker S, Werner-Seidler A, Wong I, Larsen ME, et al. Suicide prevention using self-  
344 guided digital interventions: a systematic review and meta-analysis of randomised controlled  
345 trials. Lancet Digital Health. 2020; 2(1):25–36. Available from:  
346 [https://doi.org/10.1016/S2589-7500\(19\)30199-2](https://doi.org/10.1016/S2589-7500(19)30199-2)

- 347 8. Nusir M, Rezik M. Systematic review of co-design in digital health for COVID-19 research.  
348 Universal Access in the Information Society. 2022. Available from:  
349 <https://doi.org/10.1007/s10209022-00964-x>
- 350 9. Goodyear-Smith F, Jackson C, Greenhalgh T. Co-design and implementation research: challenges  
351 and solutions for ethics committees. BMC Medical Ethics. 2015. Available from:  
352 <https://doi.org/10.1186/s12910-015-0072-2>
- 353 10. Care Quality Commission. Experts by Experience [Internet]. 2023 [cited 2023 March 31].  
354 Available from: <https://www.cqc.org.uk/about-us/jobs/experts-experience>
- 355 11. Wepa D, Neal M, Abo-Gazala W, Cusworth S, Hargan J, Mistry M, et al. Codesign of a digital  
356 health tool for suicide prevention: protocol for a scoping review. BMJ Open. 2023. Available from:  
357 <https://doi.org/10.1136/bmjopen-2022-070329>
- 358 12. Arksey H, O'Malley L. Scoping studies: towards a methodological framework. International  
359 Journal of Social Research Methodology. 2005; 1:19-32. Available from:  
360 <https://doi.org/10.1080/1364557032000119616>
- 361 13. Levac D, Colquhoun H, O'Brien KK. Scoping studies: advancing the methodology. Implement  
362 Science. 2020; 20(5):69. Available from: <https://doi.org/10.1080/1364557032000119616>
- 363 14. Tricco AC, Lillie E, Zarin W, O'Brien KK, Colquhoun H, Levac D, et al. Prisma Extension for Scoping  
364 Reviews (PRISMA-ScR): Checklist and Explanation. Annals of Internal Medicine. 2018; 169(7):467-  
365 473. Available from: <https://doi.org/10.7326/M18-0850>
- 366 15. Peters M, Marnie C, Tricco A, Pollock D, Munn Z, Lyndsay A, et al. Updated methodological  
367 guidance for the conduct of scoping reviews. JBI Synthesis. 2020; 18(10):2119-2126. Available from  
368 <https://doi.org/10.11124/JBIES-20-00167>
- 369 16. Veritas Health Innovation. Covidence Systematic Review Software [Internet]. 2022 [cited 2023  
370 March 31]. Available from: <https://www.covidence.org>
- 371 17. De Jaegere E, van Landschoot R, van Heeringen K, van Spijker B, Kerkhof A, Mokkenstorm J, et al.  
372 The online treatment of suicidal ideation: A randomised controlled trial of an unguided web-based

- 373 intervention. Behaviour Research and Therapy. 2019; 119:1-8. Available from  
374 <https://doi.org/10.1016/j.brat.2019.05.003>
- 375 18. Dimeff L, Jobes D, Koerner K, Kako N, Tropher J, Keey-Brimer A, et al. Using a table-based app to  
376 deliver evidence-based practices for suicidal patients in the emergency department: Pilot randomized  
377 control trial. JMIR Mental Health. 2021; 8(3):1-15. Available from <https://doi.org/10.2196/23022>
- 378 19. O'Toole M, Arendt M, Pedersen C. Testing an app-assisted treatment for suicide prevention in a  
379 randomized controlled trial: Effects on suicide risk and depression. Behavior Therapy. 2018; 50:421-  
380 429. Available from <https://doi.org/10.1016/j.beth.2018.07.007>
- 381 20. Rozek D, Andres W, Smith N, Leifker F, Arne K, Jennings G, et al. Using machine learning to predict  
382 suicide attempts in military personnel. Psychiatry Research. 2020; 294:1-5. Available from  
383 <https://doi.org/10.1016/j.psychres.2020.112515>
- 384 21. Chen M, Chan K. Effectiveness of digital health interventions on unintentional injury, violence and  
385 suicide: Meta-analysis. Trauma, violence & abuse. 2020; 23(2):605-619. Available from  
386 <https://doi.org/10.1177/1524838020967346>
- 387 22. Torous J, Nicholas J, Larsen M, Firth J, Christensen H. Clinical review of user engagement with  
388 mental health smartphone apps: evidence, theory and improvements. Evidence Based Mental Health.  
389 2018; 21(3):116-119. Available from: <https://doi.org/10.1136/be-2018-102891>
- 390 23. Buscher R, Torok M, Terhorst Y, Sander L. Internet-based cognitive behavioral therapy to reduce  
391 suicidal ideation: A systematic review and meta-analysis. JAMA Network Open. 2020; 3(4):1-13.  
392 Available from <https://doi.org/10.1001/jamanetworkopen.2020.3933>
- 393 24. Goldberg S, Lam S, Simonsson O, Torous J, Sun S. Mobile phone-based interventions for mental  
394 health: A systematic meta-review of 14 meta-analyses of randomized controlled trials. PLOS Digital  
395 Health. 2022; 1(1):1-21. Available from <https://doi.org/10.1371/journal.pdig.0000002>

- 396 25. Baines R, Bradwell H, Edwards K, Stevens S, Prime S, Tredinnick-Rowe J, et al. Meaningful patient  
397 and public involvement in digital health innovation, implementation and evaluation: A systematic  
398 review. *Health Expectations*. 2022; 1-14. Available from <https://doi.org/10.1111/hex.13506>
- 399 26. Hobson G, Caffery L, Neuhaus M, Langbecker D. Mobile health for First Nations populations:  
400 Systematic Review. *JMIR MHealth and UHealth*. 2019; 7(10):1-16. Available from  
401 <https://doi.org/10.2196/14877>
- 402 27. Kreuze E, Jenkins C, Gregoski M, York J, Mueller M, Lamis D, et al. Technology-enhanced suicide  
403 prevention interventions: A systematic review. *Journal of Telemedicine and Telecare*. 2017; 23(6):605-  
404 617. Available from <https://doi.org/10.1177/1357633X16657928>
- 405 28. Martinengo L, Van Galen L, Lum E, Kowalski M, Subramaniam M, Car J. Suicide prevention and  
406 depression apps' suicide risk assessment and management: a systematic assessment of adherence to  
407 clinical guidelines. *BMC Medicine*. 2019; 17(231):1-12. Available from  
408 <https://doi.org/10.1186/s12916-019-1461-z>
- 409 29. Pospos S, Young I, Downs N, Iglewicz A, Depp C, Chen J, et al. Web-based tools and mobile  
410 applications to mitigate burnout, depression and suicidality among healthcare students and  
411 professionals: A systematic review. *Academic Psychiatry*. 2018; 42:109-120. Available from  
412 <https://doi.org/10.1007/s40596-017-0868-0>
- 413 30. Bailey E, Muhlmann C, Rice S, Nedeljkovic M, Alvarez-Jimenez M, Sander L, et al. Ethical issues  
414 and practical barriers in internet-based suicide prevention research: a review and investigator  
415 survey. *BMC Medical Ethics*. 2020; 21(37):1-16. Available from  
416 <https://bmcmethics.biomedcentral.com/articles/10.1186/s12910-020-00479-1>
- 417 31. Lai M, Maniam T, Chan L, Ravindran A. Caught in the web: A review of web-based suicide  
418 prevention. *Journal of Medical Internet Research*. 2014; 16(1):1-8. Available from  
419 <https://doi.org/10.2196/jmir.2973>

- 420 32. Milne-Ives M, Selby E, Inkster B, Lam C, Meinert E. Artificial intelligence and machine learning in  
421 mobile apps for mental health: A scoping review. PLOS Digital Health. 2022; 1(8):1-13. Available from  
422 <https://doi.org/10.1371/journal.pdig.0000079>
- 423 33. Rassy J, Bardon C, Dargis L, Cote LP, Corthesy-Blondin L, Morch CM, et al. Information and  
424 communication technology use in suicide prevention: Scoping review. Journal of Medical Internet  
425 Research. 2021; 23(5):1-20. Available from <https://doi.org.10.2196/25288>
- 426 34. Reen J, Friday A, Orji R. Saving life and keeping privacy: A study on mobile apps for suicide  
427 prevention and privacy policies. Persuasive. 2022; 190-207. Available from  
428 [https://doi.org/10.1007/978-3-030-98438-0\\_15](https://doi.org/10.1007/978-3-030-98438-0_15)
- 429 35. Rice S, Robinson J, Bendall S, Hetrick S, Cox G, Bailey E, et al. Online and social media suicide  
430 prevention interventions for young people: A focus on implementation and moderation. Journal of  
431 the Canadian Academy of Child and Adolescent psychiatry. 2016; 25(2):80-86. Available from  
432 [https://researchmgt.monash.edu/we/portalfiles/portal/303332545/303332247\\_0a.pdf](https://researchmgt.monash.edu/we/portalfiles/portal/303332545/303332247_0a.pdf)
- 433 36. Balcombe L, Diego D. Human-computer interaction in digital mental health. Informatics. 2022;  
434 9(14):1-18. Available from <https://doi.org/10.3390/informatics9010014>
- 435 37. Balcombe L, Diego D. The potential impact of adjunct digital tools and technology to help  
436 distressed and suicidal men: An integrative review. Frontiers in Psychology. 2022; 12:1-10. Available  
437 from <https://doi.org/10.3389/fpsyg.2021.796371>
- 438 38. Berrouiguet S, Gravey M, Le Galudec M, Alavi Z, Walter M. Post-acute crisis text messaging  
439 outreach for suicide prevention: A pilot study. Psychiatry Research. 2014; 217:154-157. Available from  
440 <http://dx.doi.org/.1016/j.psychres.2014.02.034>
- 441 39. Brown K, Toombs M, Nasir B, Kisely S, Ranmuthugala G, Brennan-Olsen S, et al. How can mobile  
442 applications support suicide prevention gatekeepers in Australian Indigenous communities? Social  
443 Science & Medicine. 2020; 258:1-10. Available from <https://doi.org/10.1016/j.socscimed.2020.113015>

- 444 40. Bruen A, Wall A, Haines-Delmont A, Perkins E. Exploring Suicidal Ideation Using an Innovative  
445 Mobile App-Strength Within Me: The Usability and Acceptability of Setting up a Trial Involving Mobile  
446 Technology and Mental Health Service Users. JMIR Mental Health. 2020;7(9):18407. Available from:  
447 <https://doi.org/10.2196/18407>
- 448 41. Buus N, Erlangsen A, River J, Andreasson K, Frandsen H, Larsen J, et al. Stakeholder perspectives  
449 on using and developing the MYPLAN suicide prevention mobile phone application: A focus group  
450 study. Archives of Suicide Research. 2018; 24(1):48-63. Available from  
451 <https://doi.org/10.1080/13811118.2018.1489319>
- 452 42. Dickter B, Bunge E, Brown L, Leykin Y, Soares E, Van Voorhees B, et al. Impact of an online  
453 depression prevention intervention on suicide risk factors for adolescents and young adults. mHealth.  
454 2019; 5(11):1-10. Available from <http://doi.org/10.21037/mhealth.2019.04.01>
- 455 43. Hetrick S, Robinson J, Burge E, Blandon R, Mobilio B, Rice S, et al. Youth Codesign of a mobile phone  
456 app to facilitate self-monitoring and management of mood symptoms in young people with major  
457 depression, suicidal ideation and self-harm. JMIR Mental Health. 2018; 5(1):1-14. Available from  
458 <https://doi.org/10.2196/mental.9041>
- 459 44. Josifovski N, Shand F, Morley K, Chia J, Henshaw R, Petrie K, et al. A pilot study of a text message  
460 and online brief contact intervention following self-harm or a suicide attempt: A mixed methods  
461 evaluation. General Hospital Psychiatry. 2022; 76:1-2. Available from  
462 <https://doi.org/10.1016/j.genhosppsy.2022.03.002>
- 463 45. Kennard B, Goldstein T, Foxwell A, McMakin D, Wolfe K, Biernesser C, et al. As safe as possible  
464 (ASAP): A brief app-supported inpatient intervention to prevent post discharge suicidal behaviour in  
465 hospitalized, suicidal adolescents. Am J Psychiatry. 2018; 175:864-872. Available from  
466 <https://doi.org/10.1176/appi.ajp.2018.17101151>

- 467 46. Kennedy A, Brumby S, Versace V, Brumby-Rendell T. The ripple effect: a digital intervention to  
468 reduce suicide stigma among farming men. BMC Public Health. 2020; 20:1-12. Available from  
469 <https://doi.org/10.1186/s12889-020-08954-5>
- 470 47. Kimberly H, O'Brien M, LeCloux M, Ross A, Gironde C, Wharff E. A pilot study of the acceptability  
471 and usability of a smartphone application intervention for suicidal adolescents and their parents.  
472 Archives of Suicide Research. 2017; 21:254-264. Available from  
473 <https://doi.org/10.1080/13811118.2016.1182094>
- 474 48. Kiosses D, Monkovic J, Stern A, Czaja S, Alexopoulos G, Arslanoglou E, Ebo T, et al. An emotion  
475 regulation tablet app for middle-aged and older adults at high suicide risk: Feasibility, acceptability  
476 and two case studies. American Journal of Geriatric Psychiatry. 2022; 30(5):575-584. Available from  
477 <https://doi.org/10.1016/j.jagp.2021.08.015>
- 478 49. Martinez-Miranda J, Martinez A, Ramos R, Aguilar H, Jimenez L, Arias Hodwar et al. Assessment of  
479 users' acceptability of a mobile-based embodied conversational agent for the prevention and  
480 detection of suicidal behaviour. Journal of Medical Systems. 2019; 43(246):1-18. Available from  
481 <https://doi.org/10.1007/s10916-019-1387-1>
- 482 50. Morgieve M, Genty C, Aze J, Dubois J, Leboyer M, Vaiva Guillaume et al. A digital companion, the  
483 Emma App, for ecological momentary assessment and prevention of suicide: Quantitative case series  
484 study. JMIR MHealth and UHealth. 2020; 8(10):1-16. Available from <https://doi.org/10.2196/15741>
- 485 51. Biddle L, Derges J, Goldsmith C, Donovan JL, Gunnell D. Online help for people with suicidal  
486 thoughts provided by charities and healthcare organisations: a qualitative study of users' perceptions.  
487 Social Psychiatry and Psychiatric Epidemiology. 2020; 55:1157–1166. Available from:  
488 <https://doi.org/10.1007/s00127-020-01852-6>



- 489 52. Castillo-Sanchez G, Camargo-Henriquez I, Munoz-Sanchez J, Franco-Martin M, Torre-Diez I. Suicide  
490 prevention mobile apps: Descriptive analysis of apps from the most popular virtual stores. JMIR  
491 MHealth and UHealth. 2019; 7(8):1-9. Available from <https://doi.org/10.2196/13885>
- 492 53. Gibson K, Wilson J, Le Grice J, Seymour F. Resisting the silence: The impact of digital  
493 communication on young people's talk about suicide. Youth & Society. 2019; 51(8):1011-1030.  
494 Available from <https://doi.org/10.1177/0044118X17720986>
- 495 54. Gould M, Chowdhury S, Lake A, Galfalvy H, Kleinman M, Kuchuk M, et al. National Suicide  
496 Prevention Lifeline crisis chat interventions: Evaluation of chatters' perceptions of effectiveness.  
497 Suicide and Life-Threatening Behavior. 2021; 51:1126-1137. Available from  
498 <https://doi.org/10.1111/sltb.12795>
- 499 55. O'Grady C, Melia R, Bogue J, O'Sullivan M, Young K, Duggan J. A mobile health approach for  
500 improving outcomes in suicide prevention (SafePlan). Journal of Medical Internet Research. 2020;  
501 22(7):1-14. Available from <https://doi.org/10.2196/17481>
- 502 56. Primack J, Bozzay M, Barredo J, Armev M, Miller I, Fisher J, et al. Feasibility and acceptability of the  
503 mobile application for the prevention of suicide (MAPS). Military Psychology. 2021; 34(3):315-325.  
504 Available from <https://doi.org/10.1080/08995605.2021.1962187>
- 505 57. Povey J, Mills P, Dingwall K, Lowell A, Singer J, Rotumah D, et al. Acceptability of mental health  
506 apps for Aboriginal and Torres Strait Islander Australians: A qualitative study. Journal of Medical  
507 Internet Research. 2016; 18(3):1-12. Available from <https://doi.org/10.2196/jmir.5314>
- 508 58. Cohen R, Rifkin-Zybutz R, Moran P, Biddle L. Web-based support services to help prevent suicide  
509 in young people and students: A mixed-methods, user-informed review of characteristics and effective  
510 elements. Health and Social Care in the Community. 2022; 30:2404-2413. Available from  
511 <https://doi.org/10.1111/hsc.13819>

- 512 59. Dreier M, Baumgardt J, Bock T, Harter M, The 8 Lives Team, Liebherz S. Development of an online  
513 suicide prevention program involving people with lived experience: ideas and challenges. Research  
514 Involvement and Engagement. 2021; 7(60):1-14. Available from [https://doi.org/10.1186/s40900-021-](https://doi.org/10.1186/s40900-021-00307-9)  
515 [00307-9](https://doi.org/10.1186/s40900-021-00307-9)
- 516 60. Bush N, Dobscha S, Crumpton R, Denneson L, Hoffman J, Crain A, et al. A virtual hope box  
517 smartphone app as an accessory to therapy: Proof-of-concepts in a clinical sample of veterans. Suicide  
518 and Life-Threatening Behaviour. 2015; 45(1):1-9. Available from <https://doi.org.10.1111/sltb.12103>
- 519 61. Meier L, Gurtner C, Nuessli S, Miletic M, Burkle T, Durrer M. SERO – A new mobile app for suicide  
520 prevention. In: Healthcare of the Future. Studies in Health Technology and Informatics. 2022; 292:3-  
521 8. Available from <https://doi.org/10.3233/SHTI220310>
- 522 62. Papyrus. Thinking of suicide? [Internet]. 2023 [cited 2023 April 3]. Available from  
523 <https://www.papyrus-uk.org>
- 524 63. Varzgani F, Tulu B, Djamasbi S, Frost E, Wang Z, Pietro J, et al. Suicide prevention through smartphone  
525 applications: A systematic review of literature. AMCIS Proceedings. 2021. Available from  
526 <https://doi.org/10.2196/jmir.5314>
- 527 64. Tighe J, Shand F, McKay K, McAllister T, Mackinnon A, Christensen H. Usage and acceptability of the  
528 iBobbly App: Pilot trial for suicide prevention in Aboriginal and Torres Strait Islander Youth. JMIR Mental  
529 Health. 2020; 7(12):e14296. Available from <https://doi.org/10.2196/14296>
- 530 65. Samaritans. Staying safe [Internet]. 2023 [cited 2023 April 3]. Available from  
531 <https://giveusashout.org>
- 532 66. Facebook. Facebook rolls out AI to detect suicidal posts before they're reported [Internet]. 2017.  
533 [cited 2023 April 3]. Available from [https://techcrunch.com/2017/11/27/facebook-ai-suicide-](https://techcrunch.com/2017/11/27/facebook-ai-suicide-prevention/)  
534 [prevention/](https://techcrunch.com/2017/11/27/facebook-ai-suicide-prevention/)

- 535 67. Save.org. Suicide can be prevented and SAVE is here to help [Internet]. 2023. [cited 2023 April 3].  
536 Available from <https://save.org>
- 537 68. National Suicide Prevention. Preventing suicide together [Internet]. 2023. [cited 2023 April 3].  
538 Available from <https://nspa.org.uk>
- 539 69. Lifeline. Lifeline is always here to help [Internet]. 2023. [cited 2023 April 3]. Available from  
540 <https://www.lifelinehelpline.info>
- 541 70. Forefront. Reconstructing resilience: Mental Health Literacy [Internet]. 2023. [cited 2023 April 3].  
542 Available from <https://intheforefront.org>
- 543 71. Mental Health and Wellbeing Commission. Transforming the mental health and wellbeing system  
544 [Internet]. 2023. [cited 2023 April 3]. Available from <https://www.mhwc.govt.nz>
- 545 72. Beyond Blue. We're here for you [Internet]. 2023. [cited 2023 April 3]. Available from  
546 <https://www.beyondblue.org.au>
- 547 73. UK Standards for Public Involvement. Definitions [Internet]. 2023. [cited 2023 April 10]. Available  
548 from <https://www.nihr.ac.uk/pi-standards/definitions>
- 549 74. Digital Divide Council. What is the Digital Divide? [Internet]. 2023. [cited 2023 April 10]. Available  
550 from <https://www.digitaldividecouncil.com/what-is-the-digital-divide/>
- 551 75. Which.co.uk. The UK 3G network switch off: what you need to know [Internet]. 2023. [cited 2023  
552 April 10]. Available from [https://www.which.co.uk/review/mobile-phone-providers/article/the-uk-3g-  
553 network-switch-off-what-you-need-to-know](https://www.which.co.uk/review/mobile-phone-providers/article/the-uk-3g-network-switch-off-what-you-need-to-know)
- 554
- 555
- 556

557

558

559

560

561

562

563

564

565

566

567

568

569

570

571

572

573

574

575

576

577

578

579

580

581

582

583

584

585

586

587

588

589

590

591

592

593

594

595
